# Supplementary material
Source: PubMed Central journal article supplement (PMC10852516)
Supplement: Supplementary_Data_1.pdf [file Supplementary_Data_1.pdf]

Supplementary Data 1. Neurotransmitter Genes Analyzed.

ABAT  
ACHE  
ADCY1  
ADCY2  
ADCY3  
ADCY4  
ADCY5  
ADCY6  
ADCY7  
ADCY8  
ADCY9  
ADRBK1  
ADRBK2  
AKT1  
AKT2  
AKT3  
ALOX12  
ALOX12B  
ALOX15  
ALOX15B  
ALOX5  
APP  
ARAF  
ARNTL  
ARRB2  
ATF2  
ATF4  
ATF6B  
BCL2  
BRAF  
CACNA1A  
CACNA1B  
CACNA1C  
CACNA1D  
CACNA1F  
CACNA1S  
CALM1  
CALM2  
CALM3  
CALML3  
CALML5  
CALML6

CALY  
CAMK2A  
CAMK2B  
CAMK2D  
CAMK2G  
CAMK4  
CASP3  
CHAT  
CHP  
CHP2  
CHRM1  
CHRM2  
CHRM3  
CHRM4  
CHRM5  
CHRNA3  
CHRNA4  
CHRNA6  
CHRNA7  
CHRNB2  
CHRNB4  
CLOCK  
COMT  
CREB1  
CREB3  
CREB3L1  
CREB3L2  
CREB3L3  
CREB3L4  
CREB5  
CYP2C18  
CYP2C19  
CYP2C8  
CYP2C9  
CYP2D6  
CYP2J2  
CYP4X1  
DDC  
DLG4  
DLGAP1  
DRD1  
DRD2  
DRD3  
DRD4

DRD5  
DUSP1  
FOS  
FYN  
GABARAP  
GABARAPL1  
GABARAPL2  
GABBR1  
GABBR2  
GABRA1  
GABRA2  
GABRA3  
GABRA4  
GABRA5  
GABRA6  
GABRB1  
GABRB2  
GABRB3  
GABRD  
GABRE  
GABRG1  
GABRG2  
GABRG3  
GABRP  
GABRQ  
GABRR1  
GABRR2  
GABRR3  
GAD1  
GAD2  
GLS  
GLS2  
GLUL  
GNA11  
GNAI1  
GNAI2  
GNAI3  
GNAL  
GNAO1  
GNAQ  
GNAS  
GNB1  
GNB2  
GNB3

GNB4  
GNB5  
GNG10  
GNG11  
GNG12  
GNG13  
GNG2  
GNG3  
GNG4  
GNG5  
GNG7  
GNG8  
GNGT1  
GNGT2  
GPHN  
GRIA1  
GRIA2  
GRIA3  
GRIA4  
GRIK1  
GRIK2  
GRIK3  
GRIK4  
GRIK5  
GRIN1  
GRIN2A  
GRIN2B  
GRIN2C  
GRIN2D  
GRIN3A  
GRIN3B  
GRM1  
GRM2  
GRM3  
GRM4  
GRM5  
GRM6  
GRM7  
GRM8  
GSK3A  
GSK3B  
HAP1  
HOMER1  
HOMER2

HOMER3  
HRAS  
HTR1A  
HTR1B  
HTR1D  
HTR1E  
HTR1F  
HTR2A  
HTR2B  
HTR2C  
HTR3A  
HTR3B  
HTR3C  
HTR3D  
HTR3E  
HTR4  
HTR5A  
HTR6  
HTR7  
ITPR1  
ITPR2  
ITPR3  
JAK2  
JMJD7-PLA2G4B  
KCND2  
KCNJ12  
KCNJ14  
KCNJ2  
KCNJ3  
KCNJ4  
KCNJ5  
KCNJ6  
KCNJ9  
KCNN2  
KCNQ1  
KCNQ2  
KCNQ3  
KCNQ4  
KCNQ5  
KIF5A  
KIF5B  
KIF5C  
KRAS  
MAOA

MAOB  
MAP2K1  
MAPK1  
MAPK10  
MAPK11  
MAPK12  
MAPK13  
MAPK14  
MAPK3  
MAPK8  
MAPK9  
NRAS  
NSF  
PIK3CA  
PIK3CB  
PIK3CD  
PIK3CG  
PIK3R1  
PIK3R2  
PIK3R3  
PIK3R5  
PLA2G10  
PLA2G12A  
PLA2G12B  
PLA2G1B  
PLA2G2A  
PLA2G2C  
PLA2G2D  
PLA2G2E  
PLA2G2F  
PLA2G3  
PLA2G4A  
PLA2G4B  
PLA2G4E  
PLA2G5  
PLA2G6  
PLCB1  
PLCB2  
PLCB3  
PLCB4  
PLCL1  
PLD1  
PLD2  
PPP1CA

PPP1CB  
PPP1CC  
PPP1R1B  
PPP2CA  
PPP2CB  
PPP2R1A  
PPP2R1B  
PPP2R2A  
PPP2R2B  
PPP2R2C  
PPP2R2D  
PPP2R3A  
PPP2R3B  
PPP2R3C  
PPP2R5A  
PPP2R5B  
PPP2R5C  
PPP2R5D  
PPP2R5E  
PPP3CA  
PPP3CB  
PPP3CC  
PPP3R1  
PPP3R2  
PRKACA  
PRKACB  
PRKACG  
PRKCA  
PRKCB  
PRKCG  
PRKX  
PTGS1  
PTGS2  
RAF1  
RAPGEF3  
SCN1A  
SHANK1  
SHANK2  
SHANK3  
SLC12A5  
SLC17A6  
SLC17A7  
SLC17A8  
SLC18A1

SLC18A2  
SLC18A3  
SLC1A1  
SLC1A2  
SLC1A3  
SLC1A6  
SLC1A7  
SLC32A1  
SLC38A1  
SLC38A2  
SLC38A3  
SLC38A5  
SLC5A7  
SLC6A1  
SLC6A11  
SLC6A13  
SLC6A3  
SLC6A4  
SRC  
TH  
TPH1  
TPH2  
TRAK2  
TRPC1

Supplementary Data 1 Legend. Genes analyzed in the Health ABC, SOF, and MrOS cohorts
